# Fentanyl reduces infarction but not stunning via $\delta$ -opioid receptors and protein kinase C in rats

R. Kato\* and P. Foëx

Nuffield Department of Anaesthetics, Radcliffe Infirmary, Woodstock Road, Oxford OX2 6HE, UK

\*Corresponding author

Langendorff rat hearts were used (i) to examine whether fentanyl reduces stunning, infarction or both, and (ii) to investigate if this protection is mediated by  $\delta$ -opioid receptors and/or protein kinase C (PKC). In the stunning study, hearts were subjected to global ischaemia (20 min) and reperfusion. This did not produce infarction. Postischaemic mechanical function was measured in hearts treated with or without fentanyl (740 nM). Fentanyl did not affect postischaemic mechanical function. In the infarction study, the left anterior descending coronary artery was occluded for 35 min and infarct size was assessed by triphenyltetrazolium chloride staining. Hearts in the control group exhibited an infarct zone/area at risk (I/R) of 39 (SEM 5)%, whereas the I/R for the fentanyl group was 13 (2)%. When the hearts were treated with a  $\delta$ -opioid receptor antagonist (naltrindole 1 nM) or a PKC inhibitor (chelerythrine 2  $\mu$ M), the effect of fentanyl was abolished, with I/R of 37 (1) and 36 (2)% respectively. In our model, we conclude that fentanyl protects against infarction but not against stunning, and that the limitation of ischaemic injury is mediated by both  $\delta$ -opioid receptors and PKC.

Br J Anaesth 2000; 84: 608–14

**Keywords:** analgesics, opioids, fentanyl; heart, myocardial ischaemia; enzymes, protein kinase C; receptors, opioid

Accepted for publication: December 12, 1999

The last decades have witnessed a large increase in the number of surgical patients with ischaemic heart disease. Anaesthetists very often treat patients with coronary artery disease and make strenuous efforts to minimize perioperative myocardial ischaemia. More than 10 years ago it was reported that halothane and isoflurane protected against myocardial stunning. Additional evidence that inhalational anaesthetics diminish myocardial injury following ischaemia has been reviewed recently by Ross and Foëx.<sup>1</sup> Moreover, morphine has been found to limit infarct size,<sup>2–4</sup> hence there is increasing interest in opioids as cardioprotective agents.

Ischaemic preconditioning is another mechanism by which the myocardium can be protected against ischaemic injury. Ischaemic preconditioning describes the protection against subsequent damage caused by prolonged ischaemia, conferred by brief periods of ischaemia.<sup>5–7</sup> This protective state lasts 1–3 h and has been demonstrated in a wide variety of animal species and in humans.<sup>5,6</sup> Activation of protein kinase C (PKC) seems to play a major role in ischaemic preconditioning.<sup>6,7</sup> PKC reportedly opens  $K_{ATP}$  channels, whose central role in ischaemic preconditioning has been generally accepted.<sup>6,7</sup> PKC is stimulated by opioid receptor agonists as well as adenosine  $A_1$ , bradykinin and noradrenaline receptor agonists and free radicals.<sup>6,7</sup> All these

substances are endogenously released in the myocardium by ischaemia and, therefore, are putative mediators of ischaemic preconditioning.<sup>6,7</sup>

In a previous report, we demonstrated that fentanyl alleviated postischaemic ventricular dysfunction and that this cardioprotective effect was mediated by opioid receptors and  $K_{ATP}$  channels.<sup>8</sup> We speculated that the cellular signal conferring the beneficial effect was passed from opioid receptors to  $K_{ATP}$  channels through the activation of PKC. Indeed, bradykinin,<sup>9</sup> adenosine,<sup>10,11</sup> endothelin<sup>12</sup> and noradrenaline,<sup>13</sup> which share common signal transduction pathways with opioids, diminish myocardial injury after ischaemia. Of further importance, this reduction in ischaemic damage is blocked by PKC inhibitors<sup>9,10,12,13</sup> or  $K_{ATP}$  channel blockers.<sup>11,12</sup> However, our previous study did not directly examine the role of PKC in the protection conferred by fentanyl.

Although fentanyl has a preferential affinity for  $\mu$ -opioid receptors, it also interacts with  $\delta$ - and  $\kappa$ -receptors.<sup>14</sup> Of the three major opioid receptors,  $\delta$ - and  $\kappa$ - but not  $\mu$ -receptors are expressed in the rat myocardium.<sup>15</sup>  $\kappa$ -Agonists have been reported to be arrhythmogenic and to worsen haemodynamics in ischaemia.<sup>16,17</sup> In contrast,  $\delta$ -opioid receptors seem to be involved with myocardial protection against ischaemic damage.<sup>3,18–21</sup> This raises our second question,

of whether the attenuation of postischaemic dysfunction by fentanyl resulted from  $\delta$ -opioid receptor stimulation.

The third question left unsolved was whether fentanyl protects against stunning or infarction, as we assessed left ventricular mechanical function. This can reflect the degree of both types of ischaemic injury, and we used a period of global ischaemia that lasted 30 min, which may result in a mixture of both types of damage.<sup>22</sup>

Therefore, we decided to examine (i) if fentanyl reduces stunning and/or infarction, and (ii) if the protection given by fentanyl is mediated by PKC and/or  $\delta$ -opioid receptors.

## Methods

The study was performed in accordance with the United Kingdom Animal Act (Scientific Procedures) 1986 (Home Office Project Licence number PPL 30/1496).

### Preparation of rat hearts

The methods used have been described in detail elsewhere.<sup>8</sup> Adult male Wistar rats (325–400 g) were anaesthetized with intraperitoneal pentobarbitone 60 mg kg<sup>-1</sup> and heparin 200 IU was administered. The hearts were rapidly excised, arrested in ice-cooled Krebs–Henseleit (KH) buffer, and perfused with KH solution by the Langendorff method. The perfusion pressure was set at 100 cm H<sub>2</sub>O and kept constant. A polyvinyl balloon filled with KH solution was inserted through the left atrium into the left ventricle and connected to a pressure transducer. A small thermistor (T200K, Digitron Instruments, Hertford, UK) was placed in the left ventricle and the heart temperature was kept at 37°C during the procedure. All hearts were paced at a fixed rate of 300 bpm. The volume of the balloon was adjusted to achieve an end-diastolic pressure (EDP) between 5 and 10 mm Hg, which was maintained throughout the procedure. In the infarction study, a 3/0 silk suture (W598, Mersilk, Ethicon, Edinburgh, UK) was passed around the main branch of the left anterior descending coronary artery (LAD) to make a snare.

### Experimental design

Figure 1 summarizes the procedure.

#### Stunning study

Groups stn-Con ( $n=9$ ) received no drug. Fentanyl was administered to the perfusate in group stn-Fen ( $n=9$ ) and remained in the perfusate for the rest of the procedure. After the drug incubation period, the aortic flow was stopped and global ischaemia induced. Ventricular pacing was stopped during ischaemia. After 20 min, aortic flow was reintroduced and continued for 120 min. Pacing was reintroduced 8 min into reperfusion and continued until the end of the procedure.

#### Infarction study

The hearts were allocated to one of six groups depending upon the chemicals added to the perfusate. Group inf-Con was treated with no drug ( $n=6$ ), group inf-Fen with fentanyl

( $n=6$ ), group inf-NIt with the selective  $\delta$ -opioid receptor antagonist naltrindole ( $n=5$ ), group inf-Fen+NIt with fentanyl and naltrindole ( $n=5$ ), group inf-Che with the PKC inhibitor chelerythrine ( $n=5$ ) and group inf-Fen+Che with fentanyl and chelerythrine ( $n=5$ ). Regional ischaemia was induced by tightening the snare around the coronary artery. After an ischaemic period of 35 min, the snare was loosened and the heart was reperfused. Pacing was maintained throughout the procedure.

In both studies, haemodynamic measurements were taken after stabilization (pre-drug), before ischaemia (pre-ischaemia) and at several points during reperfusion. Measurements included developed pressure (DP), EDP, maximum positive and minimum negative derivative of left ventricular pressure ( $+dP/dt_{\max}$  and  $-dP/dt_{\min}$  respectively) and coronary flow (CF). Details of haemodynamic data collection have been published elsewhere.<sup>8</sup> At the end of perfusion, infarct size was measured using the triphenyltetrazolium chloride (TTC) staining method (see below). The concentrations of the drugs were fentanyl 740 nM (Janssen-Cilag, Buckinghamshire, UK), naltrindole 1 nM (Research Biochemicals International, MA, USA) and chelerythrine 2  $\mu$ M (Research Biochemicals International).

### Evaluation of infarct area

#### Stunning study

The heart was frozen and sliced into cross-sectional pieces just over 1 mm thick. The pieces were incubated in 1% TTC (Sigma Chemical Co., Dorset, UK) in 0.1 M phosphate buffer (pH=7.4) at 37°C for 20–30 min. This was used to distinguish unstained (grey) infarct and stained (red) non-infarct zones. The slices were immersed in 10% formalin in saline for 1–2 days. The slices were sandwiched between transparent plates to a thickness of 1 mm. The image of the heart slices were traced on a transparent sheet. Infarct and non-infarct areas were determined by planimetry using SigmaScan (Jandel Corporation, CA, USA).

#### Infarction study

The LAD occluder was retightened at the end of reperfusion and 0.125% Evans blue in saline was injected into the heart through the aorta for visualization of the non-ischaemic zone. Hearts were then sliced and stained in the same way as in the stunning study. Each non-ischaemic, risk (ischaemic but not infarct) or infarct area was determined by planimetry.

### Statistics

All values are expressed as mean (SEM). Differences in haemodynamic indices between groups at various time points were compared using two-way analysis of variance (ANOVA) for treatment and time with repeated measures on a time factor. The comparison of infarct area/area at risk and area at risk was performed by one-way ANOVA combined with Bonferroni's test. Statistical significance was assumed at the  $P<0.05$  level.

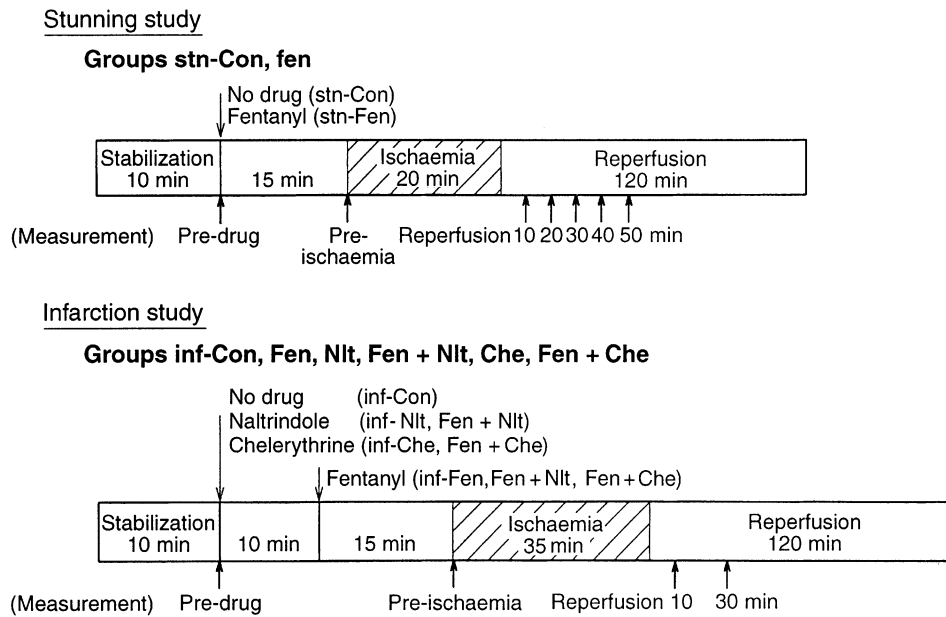

Fig 1 Procedure of the experiments.

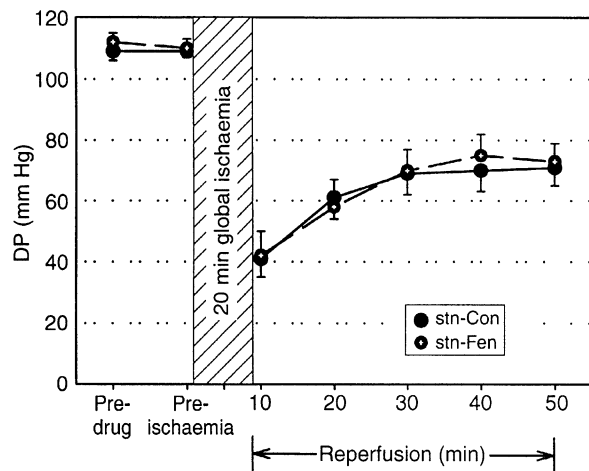

Fig 2 Recovery of developed pressure (DP) in the stunning study. Results are mean (SEM). No significant difference was found between the groups. stn=stunning; Con=control; Fen=fentanyl.

## Results

### Stunning study

The indices of mechanical function obtained for DP, PSP, EDP,  $+dP/dt_{max}$ ,  $-dP/dt_{min}$  and CF are shown in Figure 2 and Table 1. Groups stn-Con and stn-Fen showed similar recovery profiles and there were no significant differences in any index at any time. No unstained (infarct) area was detected by TTC in any hearts.

### Infarction study

Table 2 illustrates haemodynamic parameters. No significant difference was found between the groups. Infarct area/area at risk (I/R) was 39 (5)% in the control group, whereas

fentanyl significantly reduced I/R to 13 (2)% ( $P<0.01$ ) (Fig. 3). Naltrindole and chelerythrine alone did not affect I/R (39 (2)% in inf-Nlt, 35 (2)% in inf-Che). When fentanyl was given with either naltrindole or chelerythrine, the extent of infarction did not differ from control (I/R was 37 (1)% for group inf-Fen+Nlt and 36 (2)% for group Fen+Che). The area at risk ( $mm^2$ ) was 212 (12) in group inf-Con, 214 (8) in group Fen and 223 (7) in group Nlt, and 217 (8) in group Fen+Nlt, 207 (8) in group Che and 214 (8) in group Fen+Che (not significant).

## Discussion

The present study shows that fentanyl reduced the extent of infarction. A similar effect has been demonstrated for morphine. In response to a LAD occlusion lasting 30 min in isolated rabbit hearts, morphine decreased infarct/area at risk from 32 to 9%.<sup>4</sup> Morphine also reduced necrosis in hearts *in vivo*<sup>2-4</sup> and in isolated ventricular myocytes;<sup>21</sup> this effect was abolished by an opioid receptor antagonist.<sup>2 4 21</sup> The attenuation of infarct area by fentanyl is consistent with these findings.

This cardioprotection produced by fentanyl was eliminated by the selective  $\delta$ -opioid receptor antagonist naltrindole. Schultz and colleagues showed that a  $\delta_1$ -opioid receptor agonist limited infarct size,<sup>19</sup> and that ischaemic preconditioning was mediated by  $\delta$ - but not  $\mu$ - or  $\kappa$ -receptors.<sup>3 20</sup> In addition, morphine-induced protection was demonstrated to result from  $\delta$ -receptor activation.<sup>3 21</sup> It should be noted that these studies on opioid subtypes have been conducted in rats, a species in which  $\mu$ -receptors have not been identified.<sup>15</sup> However, in other species,  $\mu$ -receptors may be identified in the myocardium, and the activation of  $\mu$ -receptors could affect the degree of ischaemic injury.

**Table 1** Haemodynamic indices before and after ischaemia in the stunning study. Results are mean (SEM). There were no differences between the two groups in any index at any measurement point. DP=developed pressure; EDP=end-diastolic pressure;  $+dP/dt_{max}$ =maximum positive derivative of left ventricular pressure;  $-dP/dt_{min}$ =minimum positive derivative of left ventricular pressure; CF=coronary flow; stn=stunning; Con=control; Fen=fentanyl

|                                         | Before drug | Before ischaemia | Reperfusion (min) |            |            |            |            |
|-----------------------------------------|-------------|------------------|-------------------|------------|------------|------------|------------|
|                                         |             |                  | 10                | 20         | 30         | 40         | 50         |
| DP (mm Hg)                              |             |                  |                   |            |            |            |            |
| stn-Con                                 | 109 (3)     | 109 (2)          | 41 (6)            | 61 (7)     | 69 (7)     | 70 (7)     | 71 (5)     |
| stn-Fen                                 | 112 (3)     | 110 (3)          | 42 (8)            | 58 (9)     | 70 (7)     | 75 (7)     | 73 (6)     |
| EDP (mm Hg)                             |             |                  |                   |            |            |            |            |
| stn-Con                                 | 6 (0)       | 6 (0)            | 55 (6)            | 40 (5)     | 35 (5)     | 33 (5)     | 33 (4)     |
| stn-Fen                                 | 5 (0)       | 5 (0)            | 55 (7)            | 40 (5)     | 34 (5)     | 32 (4)     | 32 (4)     |
| $+dP/dt_{max}$ (mm Hg s <sup>-1</sup> ) |             |                  |                   |            |            |            |            |
| stn-Con                                 | 2782 (77)   | 2857 (61)        | 861 (177)         | 1489 (227) | 1778 (238) | 1898 (214) | 1922 (201) |
| stn-Fen                                 | 2937 (90)   | 2989 (83)        | 932 (227)         | 1500 (242) | 1929 (227) | 2151 (207) | 2176 (176) |
| $-dP/dt_{min}$ (mm Hg s <sup>-1</sup> ) |             |                  |                   |            |            |            |            |
| stn-Con                                 | 2203 (126)  | 2157 (73)        | 592 (147)         | 1167 (179) | 1342 (180) | 1409 (166) | 1408 (157) |
| stn-Fen                                 | 2112 (57)   | 2134 (57)        | 768 (165)         | 1148 (175) | 1391 (147) | 1481 (145) | 1463 (125) |
| CF (ml min <sup>-1</sup> )              |             |                  |                   |            |            |            |            |
| stn-Con                                 | 18 (1)      | 17 (1)           | 13 (1)            | 14 (1)     | 14 (0)     | 14 (0)     | 13 (0)     |
| stn-Fen                                 | 17 (1)      | 17 (1)           | 13 (1)            | 14 (1)     | 14 (1)     | 13 (1)     | 13 (1)     |

**Table 2** Haemodynamic indices in the infarction study. Results are mean (SEM). No differences were found between groups. DP=developed pressure; EDP=end-diastolic pressure; CF=coronary flow; inf=infarction; Con=control; Fen=fentanyl; Nlt=naltrindole; Che=chelerythrine

|                            | Before drug | Before ischaemia | Ischaemia (min) |        | Reperfusion (min) |        |
|----------------------------|-------------|------------------|-----------------|--------|-------------------|--------|
|                            |             |                  | 5               | 35     | 10                | 30     |
| DP (mm Hg)                 |             |                  |                 |        |                   |        |
| inf-Con                    | 112 (6)     | 109 (8)          | 35 (3)          | 56 (5) | 90 (3)            | 83 (7) |
| inf-Fen                    | 111 (5)     | 107 (5)          | 37 (3)          | 57 (4) | 86 (1)            | 77 (8) |
| inf-Nlt                    | 112 (3)     | 108 (2)          | 42 (2)          | 58 (1) | 90 (2)            | 87 (4) |
| inf-Fen+Nlt                | 108 (5)     | 103 (2)          | 42 (4)          | 59 (3) | 86 (2)            | 81 (2) |
| inf-Che                    | 112 (5)     | 109 (7)          | 41 (5)          | 58 (5) | 92 (7)            | 92 (7) |
| inf-Fen+Che                | 108 (4)     | 105 (5)          | 47 (3)          | 63 (4) | 87 (6)            | 84 (4) |
| EDP (mm Hg)                |             |                  |                 |        |                   |        |
| inf-Con                    | 6 (0)       | 5 (1)            | 3 (0)           | 4 (1)  | 10 (2)            | 9 (2)  |
| inf-Fen                    | 5 (0)       | 5 (1)            | 4 (0)           | 3 (0)  | 7 (1)             | 7 (1)  |
| inf-Nlt                    | 5 (1)       | 6 (1)            | 4 (1)           | 5 (1)  | 11 (2)            | 9 (2)  |
| inf-Fen+Nlt                | 5 (1)       | 5 (1)            | 4 (0)           | 5 (1)  | 13 (3)            | 10 (2) |
| inf-Che                    | 6 (0)       | 6 (0)            | 5 (1)           | 5 (1)  | 9 (1)             | 7 (1)  |
| inf-Fen+Che                | 6 (1)       | 5 (0)            | 4 (0)           | 4 (0)  | 8 (1)             | 6 (1)  |
| CF (ml min <sup>-1</sup> ) |             |                  |                 |        |                   |        |
| inf-Con                    | 19 (0)      | 18 (1)           | 8 (1)           | 8 (1)  | 17 (1)            | 17 (1) |
| inf-Fen                    | 18 (1)      | 19 (2)           | 9 (1)           | 10 (1) | 20 (1)            | 17 (1) |
| inf-Nlt                    | 18 (1)      | 17 (0)           | 8 (1)           | 9 (1)  | 20 (2)            | 18 (2) |
| inf-Fen+Nlt                | 19 (1)      | 18 (1)           | 8 (1)           | 10 (1) | 19 (1)            | 18 (1) |
| inf-Che                    | 18 (0)      | 18 (1)           | 9 (1)           | 10 (1) | 19 (1)            | 18 (1) |
| inf-Fen+Che                | 18 (1)      | 17 (1)           | 9 (1)           | 9 (1)  | 18 (1)            | 17 (1) |

PKC transfers  $\gamma$ -phosphate from ATP to hydroxyl groups of serine/threonine residues in proteins. In the cardiac myocytes, this phosphorylation controls the function of many cellular effectors, and hence regulates various events, such as contraction and cell growth.<sup>23</sup> Consistent with our hypothesis, the PKC inhibitor chelerythrine eliminated the cardioprotective effect of fentanyl, resulting in increased infarct area. Miki and colleagues also showed in rabbits that chelerythrine abolished the infarct-limiting effect of morphine.<sup>4</sup> Our study also suggests that opioids reduce infarct size through PKC-linked mechanisms. PKC and  $K_{ATP}$  channels are signalling effectors shown to be central to ischaemic preconditioning.<sup>6,7</sup> In our previous study, we

demonstrated that fentanyl elicits myocardial protection via opioid receptors and  $K_{ATP}$  channels. Taking into account previous findings, the present study strongly supports the PKC hypothesis for the protective mechanism of fentanyl; that is, the signal from fentanyl is passed to  $\delta$ -opioid receptors, PKC and then  $K_{ATP}$  channels in the myocardium.

However, the PKC hypothesis remains somewhat controversial. Firstly, the link between  $\delta$ -opioid receptors and PKC has not been characterized directly in the myocardium. In rat myocytes, Ventura and colleagues demonstrated that  $\delta$ -receptor stimulation increased the level of inositol 1,4,5-triphosphate.<sup>24</sup> PKC-coupled receptors generally induce phosphoinositide turnover, leading to the production of

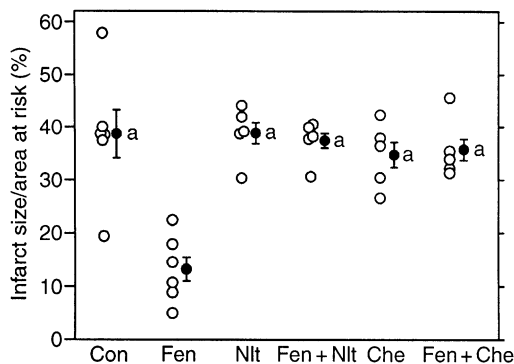

**Fig 3** Infarct area/area at risk (I/R) after 35 min regional ischaemia. Open and closed circles represent individual animal I/R and group mean (SEM) respectively. a= $P < 0.01$  compared with the group receiving fentanyl alone. Con=control; Fen=fentanyl; Nlt=naltrindole; Che=chelerythrine.

inositol 1,4,5-triphosphate and diacylglycerol; the latter activates PKC directly.<sup>23–25</sup> In glial cells, however, it is widely accepted that  $\delta$ -opioid receptor agonists activate PKC<sup>26–27</sup>, and this could be extrapolated to the myocardium.

Secondly, some authors have taken issue with a number of previous studies which support PKC as a major contributor to preconditioning.<sup>23–28</sup> They argue that what was considered as the effects of PKC agonists or antagonists could have been caused by other kinases. Most of the reports were based on the use of various PKC agonists and antagonists, many of which may not be specific for PKC and may affect other protein kinases. We also used a pharmacological method in this study, and therefore our findings are not free from this criticism. There are currently no reliable standard techniques; thus, the controversy over PKC will not be resolved conclusively until selective PKC inhibitors have been developed.<sup>23–25</sup>

PKC inhibitors have been reported recently to be cardioprotective against ischaemic injury at relatively low doses.<sup>29–30</sup> Chelerythrine 1  $\mu$ M alleviated ischaemic injury in rats according to Lundmark and colleagues.<sup>30</sup> In contrast, Bugge and colleagues have reported that 2  $\mu$ M chelerythrine blocked the infarct-reducing effect of ischaemic preconditioning,<sup>31</sup> bradykinin<sup>9</sup> and endothelin<sup>12</sup> without showing protective effects. Our finding is in agreement with the studies by Bugge and colleagues.<sup>9–12–31</sup>

It is generally agreed that  $K_{ATP}$  channels, which are primed by PKC, function as pivotal effectors in ischaemic and pharmacological preconditioning.<sup>6–7</sup> There are two kinds of  $K_{ATP}$  channels in the myocardium: sarcolemmal and mitochondrial  $K_{ATP}$  channels. Recent studies suggest that mitochondrial  $K_{ATP}$  mediate cardioprotection.<sup>32</sup> However, the nature of more distal effectors is currently poorly understood, and remains a controversial issue in the PKC hypothesis.

As we used a whole-heart model, the myocardium is not the only fentanyl-sensitive target. We should also take the vascular system in the heart into account. For example, nitric oxide (NO) is released from endothelial cells. Opioids

increase the release of NO from the endothelial cells in the vascular system.<sup>33</sup> Hence, fentanyl could produce increased coronary collateral flow to ischaemic areas during ischaemia, reducing infarction. However, we believe this is unlikely, as no significant differences in coronary flow between groups were detected during ischaemia; moreover, collateral vasculature is not well developed in rat hearts.<sup>34</sup> Interestingly, NO is known to stimulate PKC<sup>35</sup> and  $K_{ATP}$  channels.<sup>36</sup> Therefore, fentanyl could have activated PKC and/or  $K_{ATP}$  channels via NO to reduce ischaemic damage.

This is the first attempt to determine the effect of an opioid on pure myocardial stunning. Our previous study showed that fentanyl did not alter haemodynamic indices in non-ischaemic hearts.<sup>8</sup> Therefore, the present study suggests that fentanyl did not affect the degree of stunning. Our group has reported previously that postschaemic systolic shortening of the left ventricular wall in fentanyl-anaesthetized rabbits was similar to that in isoflurane-anaesthetized animals.<sup>37</sup> This suggested that fentanyl might be protective against ischaemic injury, for there is general consensus that isoflurane attenuates the degree of ischaemic damage.<sup>1</sup> The reason why fentanyl reduced infarction but not stunning remains to be elucidated. A number of cellular events occur after the onset of ischaemia, and they become progressively more severe with time. The sequence is highly variable and as yet no clear border separating cell survival from death exists.<sup>38</sup> However, one hypothesis might be that there is an essential step in the course of developing ischaemic damage which makes the myocardium destined to die, and that fentanyl delays this process. Meldrum and colleagues suggested that different PKC isoforms are linked to different aspects of myocardial protection against ischaemic injury.<sup>39</sup> Fentanyl might have activated the specific PKC isoforms that reduce infarction but not stunning. Another explanation could be that fentanyl reduced infarction by increasing coronary collateral flow. It was not possible for fentanyl to exhibit protection in our stunning model because this involved global rather than regional ischaemia.

Although TTC staining is a reliable method for the quantification of infarct size,<sup>40</sup> it is not sensitive enough to detect necrosis of a single cell. This implies that a very small amount of infarction might have occurred in our stunning model. However, it is highly unlikely that infarction of a small fraction of myocardium affects the haemodynamics of the whole heart. Thus, we consider our model valid in assessing the degree of stunning.

We conclude that fentanyl limits infarction but does not attenuate stunning, and that this protection against infarction is mediated by an  $\delta$ -opioid receptors and PKC-linked mechanism in our rat model. Further studies are needed to determine whether the contribution of fentanyl in decreasing infarction could be applied to clinical practice. The elucidation of its mechanism could lead to the development of novel interventions to reduce infarction in the future.

## Acknowledgements

The authors thank Dr Gary F. Baxter and Dr Mihaela Mocanu of the Hatter Institute for Cardiovascular Studies, University College London, for detailed advice about the validation of infarct area. Dr Kato was in receipt of a Honjo International Scholarship, Japan. The study was supported in part by a grant from the Garfield Weston Trust for Medical Research into Diseases of the Heart.

## References

- 1 Ross S, Foëx P. Protective effects of anaesthetics in reversible and irreversible ischaemia-reperfusion injury. *Br J Anaesth* 1999; **82**: 633–2
- 2 Schultz JJ, Hsu AK, Gross GJ. Morphine mimics the cardioprotective effect of ischemic preconditioning via a glibenclamide-sensitive mechanism in the rat heart. *Circ Res* 1996; **78**: 1100–4
- 3 Schultz JJ, Hsu AK, Gross GJ. Ischemic preconditioning and morphine-induced cardioprotection involve the delta ( $\delta$ )-opioid receptor in the intact rat heart. *J Mol Cell Cardiol* 1997; **29**: 2187–95
- 4 Miki T, Cohen MV, Downey JM. Opioid receptor contributes to ischemic preconditioning through protein kinase C activation in rabbits. *Mol Cell Biochem* 1998; **186**: 3–12
- 5 Lawson CS, Downey JM. Preconditioning: state of the art myocardial protection. *Cardiovasc Res* 1993; **27**: 542–50
- 6 Yellon DM, Baxter GF, Garcia Dorado D, Heusch G, Sumeray MS. Ischaemic preconditioning: present position and future directions. *Cardiovasc Res* 1998; **37**: 21–33
- 7 Meldrum DR, Cleveland JC Jr, Rowland RT, Banerjee A, Harken AH, Meng X. Early and delayed preconditioning: differential mechanisms and additive protection. *Am J Physiol* 1997; **273**: H725–33
- 8 Kato R, Ross SA, Foëx P. Fentanyl protects the heart against ischaemic injury via opioid receptors, adenosine A<sub>1</sub> receptors, and K<sub>ATP</sub> channels linked mechanism in rats. *Br J Anaesth* 2000; **84**: 204–14
- 9 Bugge E, Ytrehus K. Bradykinin protects against infarction but does not mediate ischemic preconditioning in the isolated rat heart. *J Mol Cell Cardiol* 1996; **28**: 2333–41
- 10 Sakamoto J, Miura T, Goto M, Iimura O. Limitation of myocardial infarct size by adenosine A<sub>1</sub> receptor activation is abolished by protein kinase C inhibitors in the rabbit. *Cardiovasc Res* 1995; **29**: 682–8
- 11 Cleveland JC Jr, Meldrum DR, Rowland RT, Banerjee A, Harken AH. Adenosine preconditioning of human myocardium is dependent upon the ATP-sensitive K<sup>+</sup> channel. *J Mol Cell Cardiol* 1997; **29**: 175–82
- 12 Bugge E, Ytrehus K. Endothelin-I can reduce infarct size through protein kinase C and K<sub>ATP</sub> channels in the isolated rat heart. *Cardiovasc Res* 1996; **32**: 920–9
- 13 Tsuchida A, Liu Y, Liu GS, Cohen MV, Downey JM.  $\alpha_1$ -Adrenergic agonists precondition rabbit ischemic myocardium independent of adenosine by direct activation of protein kinase C. *Circ Res* 1994; **75**: 576–85
- 14 Maguire P, Tsai N, Kamal J, Cometta Morini C, Upton C, Loew G. Pharmacological profiles of fentanyl analogs at  $\mu$ ,  $\delta$  and  $\kappa$  opiate receptors. *Eur J Pharmacol* 1992; **213**: 219–25
- 15 Zimlichman R, Gefel D, Eliahou H, et al. Expression of opioid receptors during heart ontogeny in normotensive and hypertensive rats. *Circulation* 1996; **93**: 1020–5
- 16 Wong TM, Lee AY, Tai KK. Effects of drugs interacting with opioid receptors during normal perfusion or ischemia and reperfusion in the isolated rat heart—an attempt to identify cardiac opioid receptor subtype(s) involved in arrhythmogenesis. *J Mol Cell Cardiol* 1990; **22**: 1167–75
- 17 Wu JP, Chen YT, Lee AY. Opioids in myocardial ischaemia: potentiating effects of dynorphin on ischaemic arrhythmia, bradycardia and cardiogenic shock following coronary artery occlusion in the rat. *Eur Heart J* 1993; **14**: 1273–7
- 18 Schultz JJ, Hsu AK, Gross GJ. Ischemic preconditioning in the intact rat heart is mediated by  $\delta_1$ - but not  $\mu$ - or  $\kappa$ -opioid receptors. *Circulation* 1998; **97**: 1282–9
- 19 Schultz JJ, Hsu AK, Nagase H, Gross GJ. TAN-67, a  $\delta_1$ -opioid receptor agonist, reduces infarct size via activation of Gi/o proteins and K<sub>ATP</sub> channels. *Am J Physiol* 1998; **274**: H909–14
- 20 Tsuchida A, Miura T, Tanno M, Nozawa Y, Kita H, Shimamoto K. Time window for the contribution of the  $\delta$ -opioid receptor to cardioprotection by ischemic preconditioning in the rat heart. *Cardiovasc Drugs Ther* 1998; **12**: 365–73
- 21 Liang BT, Gross GJ. Direct preconditioning of cardiac myocytes via opioid receptors and KATP channels. *Circ Res* 1999; **84**: 1396–400
- 22 Moolman JA, Genade S, Winterbach R, Harper IS, Williams K, Lochner A. Preconditioning with a single short episode of global ischemia in the isolated working rat heart: effect on structure, mechanical function, and energy metabolism for various durations of sustained global ischemia. *Cardiovasc Drugs Ther* 1995; **9**: 103–15
- 23 Simkhovich BZ, Przyklenk K, Kloner RA. Role of protein kinase C as a cellular mediator of ischemic preconditioning: a critical review. *Cardiovasc Res* 1998; **40**: 9–22
- 24 Ventura C, Spurgeon H, Lakatta EG, Guarnieri C, Capogrossi MC.  $\kappa$  and  $\delta$  opioid receptor stimulation affects cardiac myocyte function and Ca<sup>2+</sup> release from an intracellular pool in myocytes and neurons. *Circ Res* 1992; **70**: 66–81
- 25 Sugden PH, Bogoyevitch MA. Intracellular signalling through protein kinases in the heart. *Cardiovasc Res* 1995; **30**: 478–92
- 26 Lou LG, Pei G. Modulation of protein kinase C and cAMP-dependent protein kinase by  $\delta$ -opioid. *Biochem Biophys Res Commun* 1997; **236**: 626–9
- 27 Kramer HK, Simon EJ. Role of protein kinase C (PKC) in agonist-induced  $\mu$ -opioid receptor down-regulation: II. Activation and involvement of the  $\alpha$ ,  $\epsilon$ , and  $\zeta$  isoforms of PKC. *J Neurochem* 1999; **72**: 594–604
- 28 Brooks G, Hearse DJ. Role of protein kinase C in ischemic preconditioning: player or spectator? *Circ Res* 1996; **79**: 627–30
- 29 Lasley RD, Noble MA, Mentzer RM Jr. Effects of protein kinase C inhibitors in in situ and isolated ischemic rabbit myocardium. *J Mol Cell Cardiol* 1997; **29**: 3345–56
- 30 Lundmark JL, Ramasamy R, Vulleit PR, Schaefer S. Chelerythrine increases Na-K-ATPase activity and limits ischemic injury in isolated rat hearts. *Am J Physiol* 1999; **277**: H999–1006
- 31 Bugge E, Ytrehus K. Ischaemic preconditioning is protein kinase C dependent but not through stimulation of alpha adrenergic or adenosine receptors in the isolated rat heart. *Cardiovasc Res* 1995; **29**: 401–6
- 32 Gross GJ, Fryer RM. Sarcolemmal versus mitochondrial ATP-sensitive K<sup>+</sup> channels and myocardial preconditioning. *Circ Res* 1999; **84**: 973–9
- 33 Stefano GB, Hartman A, Bilfinger TV, Magasine HI, Liu Y, Casares F, et al. Presence of the  $\mu_3$  opiate receptor in endothelial cells. Coupling to nitric oxide production and vasodilation. *J Biol Chem* 1995; **270**: 30290–3
- 34 Maxwell MP, Hearse DJ, Yellon DM. Species variation in the coronary collateral circulation during regional myocardial ischaemia: a critical determinant of the rate of evolution and extent of myocardial infarction. *Cardiovasc Res* 1987; **21**: 737–46
- 35 Ping P, Takano H, Zhang J, Tang XL, Qiu Y, Li RC, et al. Isoform-selective activation of protein kinase C by nitric oxide in

- the heart of conscious rabbits: a signaling mechanism for both nitric oxide-induced and ischemia-induced preconditioning. *Circ Res* 1999; **84**: 587–604
- 36** Shinbo A, Iijima T. Potentiation by nitric oxide of the ATP-sensitive  $K^+$  current induced by  $K^+$  channel openers in guinea-pig ventricular cells. *Br J Pharmacol* 1997; **120**: 1568–74
- 37** Piriou V, Ross S, Pigott D, Evans R, Foëx P. Beneficial effect of concomitant administration of isoflurane and nicorandil. *Br J Anaesth* 1997; **79**: 68–77
- 38** Hearse DJ. Myocardial protection during ischemia and reperfusion. *Mol Cell Biochem* 1998; **186**: 177–84
- 39** Meldrum DR, Cleveland JC Jr, Meng X, Sheridan BC, Cain BS, Harken AH, et al. Protein kinase C isoform diversity in preconditioning. *J Surg Res* 1997; **69**: 183–7
- 40** Ito W, Schaarschmidt S, Klask R, Hansen S, Scafer HJ, Mathey D, et al. Infarct size measurement by triphenyltetrazolium chloride staining versus in vivo injection of propidium iodide. *J Mol Cell Cardiol* 1997; **29**: 2169–75
